# Supplementary material for: Long-term drug modification to the surface of mesenchymal stem cells by the avidin-biotin complex method
Source: PubMed Central journal article supplement (PMC5717103; doi:10.1038/s41598-017-17166-8), 2017-12-05
Supplement: 41598_2017_17166_MOESM1_ESM.pdf [file 41598_2017_17166_MOESM1_ESM.pdf]

## **Supplementary information**

### **Long-term drug modification to the surface of mesenchymal stem cells by the avidin-biotin complex method**

Yukiya Takayama, Kosuke Kusamori, Mika Hayashi, Noriko Tanabe, Satoru Matsuura,  
Mari Tsujimura, Hidemasa Katsumi, Toshiyasu Sakane, Makiya Nishikawa and Akira  
Yamamoto

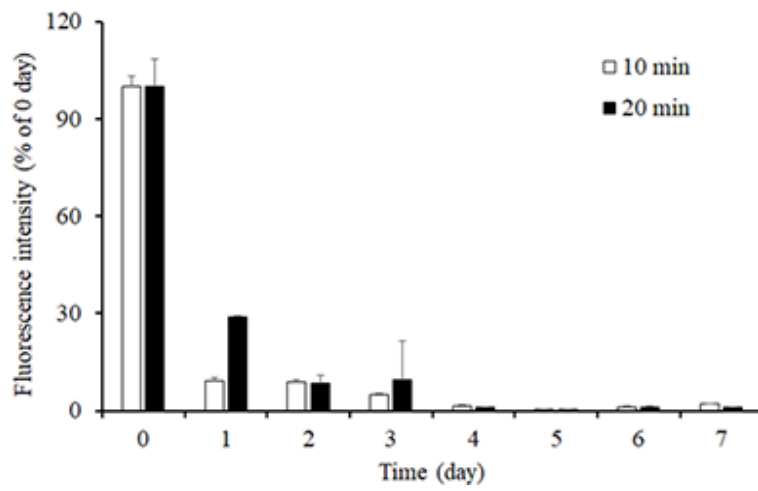

**Supplementary Fig. 1.** The fluorescence intensity of FITC-modified C3H10T1/2 cells prepared using 500  $\mu$ M NHS-FITC. C3H10T1/2 cells were incubated with NHS-FITC for 10 min (white) and 20 min (black). Results are expressed as means  $\pm$  SD (n = 4).

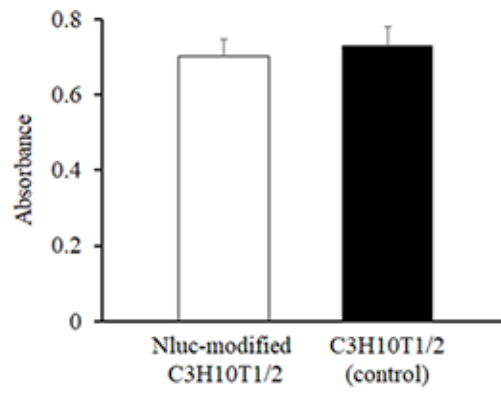

**Supplementary Fig. 2.** Adhesion of Nluc-modified C3H10T1/2 cells onto cell culture plate at 24 h. Results are expressed as means  $\pm$  SD (n = 4).

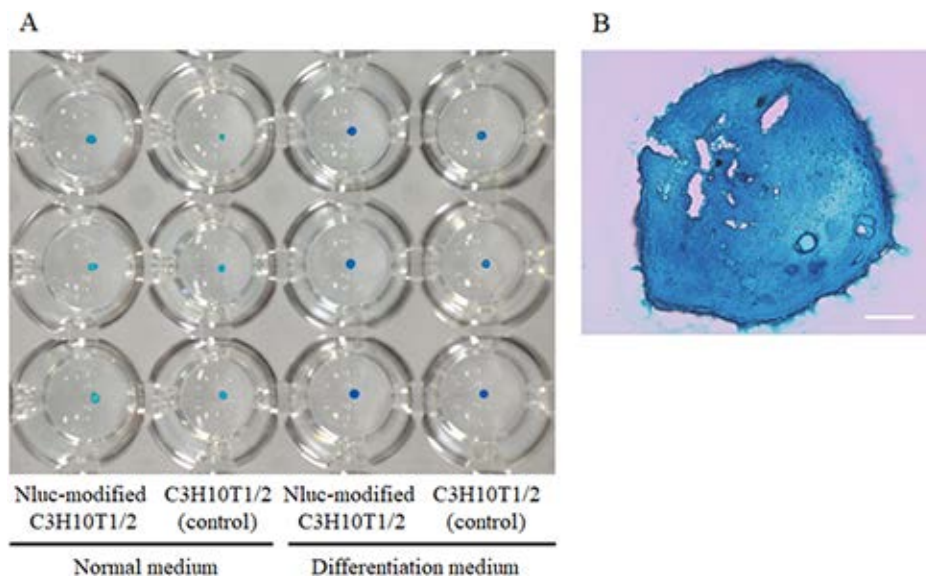

**Supplementary Fig. 3.** Differentiation of Nluc-modified C3H10T1/2 cells into chondrocytes. (A) The typical images of Nluc-modified C3H10T1/2 cells and C3H10T1/2 cells (control) that differentiated into chondrocytes. (B) The cryosection image of Nluc-modified C3H10T1/2 cells after Alcian Blue staining. Scale bar represents 100  $\mu\text{m}$ .
